# Supplementary material for: Developmental and light-entrained expression of melatonin and its relationship to the circadian clock in the sea anemone Nematostella vectensis
Source: PubMed Central journal article supplement (PMC4169136; doi:10.1186/2041-9139-5-26), 2014-08-14
Supplement: 2041-9139-5-26-S1.pdf [file 2041-9139-5-26-S1.pdf]

## Supplementary Information 1:

### Primers information:

- Clock, 5'-TCGGCTCCCCGAGTCTAGCG-3'(sense) and 5'-GCATCGCGGCGAACCCAGTA-3' (antisense), 59.8°C, 110bp, accession number XP\_001639742
- Cycle, 5'-TGTCTCGTGGCCGTCGGAAG-3'(sense) and 5'-GGCGACATCCGGTCGGGAAA-3' (antisense), 59°C, 72bp, accession number XP\_001624731
- Timeout, 5'-GTGCCTTCGCAGGTGGGACG-3'(sense) and 5'-GGCTTTCGTTGTCCGACTCGCT-3' (antisense), 60°C, 96bp, accession number XP\_001641000
- Cry1a, 5'-GCGGCATGGCAAGACAGGCT-3'(sense) and 5'-CACCCAATGGACTGCCGGGC-3' (antisense), 60.3°C, 99bp, accession number XP\_001631029
- Cry1b, 5'-TCGGACCGGACCATGCTGACA-3'(sense) and 5'-TCGTCGCAAAGCTTCGGGCT-3' (antisense), 59.6°C, 122bp, accession number XP\_001632849
- Cry2, 5'-AGCTCGCCGTAAGGGCGG-3'(sense) and 5'-ATATAAGCGCCTGCACCCGCG-3' (antisense), 59.8°C, 75bp, accession number XP\_001623146
- TPH: 5'-AAAAACTCGCCACGCTCTACTGG-3'(sense) and 5'-CGGTCAAGCAATACTGTA ACTCCCC-3' (antisense), 56.4°C, 123bp, accession number XM\_001623795.1
- HIOMT: 5'-CGAGATTTGATTGCGTTCACCG-3'(sense) and 5'-AAAACAGCCAGTTCCTCCTCCAAG-3' (antisense), 59°C, 107bp, accession number XM\_001627179.1
- Ribosomal protein P0: 5'-GGCTTCGTCTTCACCAAGGAGGAG-3'(sense) and 5'-CCAGCAGGGACAAACACATCAATA-3' (antisense), 60.5°C, 117bp, accession number

XM\_001626244.1
