# Supplementary material for: Developmental and light-entrained expression of melatonin and its relationship to the circadian clock in the sea anemone Nematostella vectensis
Source: PubMed Central journal article supplement (PMC4169136; doi:10.1186/2041-9139-5-26), 2014-08-14
Supplement: 2041-9139-5-26-S2.pdf [file 2041-9139-5-26-S2.pdf]

## 7 NV1

|                  |                                           |                   |               |
|------------------|-------------------------------------------|-------------------|---------------|
| Sample Name:     | <b>NV1</b>                                | Injection Volume: | <b>40,0</b>   |
| Vial Number:     | <b>GB10</b>                               | Channel:          | <b>ECD_1</b>  |
| Sample Type:     | <b>unknown</b>                            | Wavelength:       | <b>n.a.</b>   |
| Control Program: | <b>5041 coluna menor melatonina_750mV</b> | Bandwidth:        | <b>n.a.</b>   |
| Quantif. Method: | <b>melatonina coluna menor</b>            | Dilution Factor:  | <b>1,0000</b> |
| Recording Time:  | <b>27/8/2012 12:10</b>                    | Sample Weight:    | <b>1,0000</b> |
| Run Time (min):  | <b>10,01</b>                              | Sample Amount:    | <b>1,0000</b> |

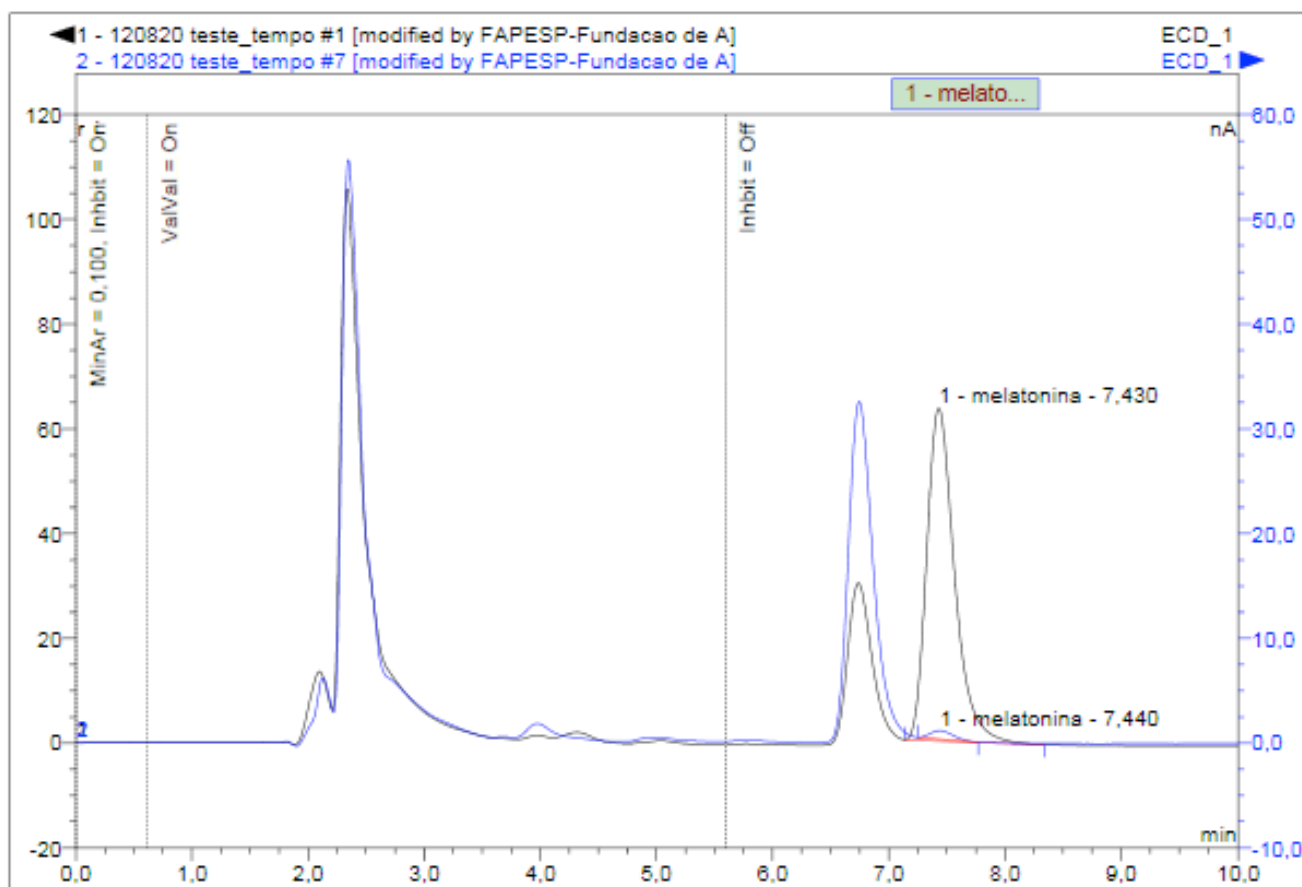

| No.             | Ret.Time<br>min | Peakname<br>min | Height<br>nA | Width<br>min | Type | Resol.<br>(EP) | Asym.<br>(EP) | Plates<br>(EP) |
|-----------------|-----------------|-----------------|--------------|--------------|------|----------------|---------------|----------------|
| 1               | 7,440           | melatonina      | 0,796        | 0,364        | BMB* | n.a.           | 1,27          | 6423           |
| <b>Average:</b> |                 |                 | 0,796        | 0,364        | n.a. | 1,27           | 6423          |                |

Chromatograms of a melatonin standard (black line) and of a *Nematostella vectensis* sample (blue line). The chromatograms show the same pattern, with the same retention time for melatonin, validating the assay.
