# Supplementary material for: Developmental and light-entrained expression of melatonin and its relationship to the circadian clock in the sea anemone Nematostella vectensis
Source: PubMed Central journal article supplement (PMC4169136; doi:10.1186/2041-9139-5-26), 2014-08-14
Supplement: 2041-9139-5-26-S3.pdf [file 2041-9139-5-26-S3.pdf]

# Formatted Alignments

|                  |                                                                    |      |      |
|------------------|--------------------------------------------------------------------|------|------|
|                  | 10                                                                 | 20   | 30   |
| tph_nematostella | <b>G T G T G T T T C T T T G A G T G A G G A A A A T G C A C G</b> |      |      |
| tph_qpcr         | - - - - -                                                          |      |      |
| tph_cloned       | - - - - -                                                          |      |      |
|                  | 40                                                                 | 50   | 60   |
| tph_nematostella | <b>C T G T A A G G C G C A A A A G A A C C T A C G A A A T C G</b> |      |      |
| tph_qpcr         | - - - - -                                                          |      |      |
| tph_cloned       | - - - - -                                                          |      |      |
|                  | 70                                                                 | 80   | 90   |
| tph_nematostella | <b>A G C C G G A C C A T G G C C C T G C T A A G A A G C A T G</b> |      |      |
| tph_qpcr         | - - - - -                                                          |      |      |
| tph_cloned       | - - - - -                                                          |      |      |
|                  | 100                                                                | 110  | 120  |
| tph_nematostella | <b>A G G G C G A A T C A G A A A A G A A A G C T A C C A C G G</b> |      |      |
| tph_qpcr         | - - - - -                                                          |      |      |
| tph_cloned       | - - - - -                                                          |      |      |
|                  | 130                                                                | 140  | 150  |
| tph_nematostella | <b>T A G T G T T T T C C C T G A A T G A G G A G G T T G G C G</b> |      |      |
| tph_qpcr         | - - - - -                                                          |      |      |
| tph_cloned       | - - - - -                                                          |      |      |
|                  | 160                                                                | 170  | 180  |
| tph_nematostella | <b>C G T T G G C C A G A G C T T T G A A A T T A T T T G A G G</b> |      |      |
| tph_qpcr         | - - - - -                                                          |      |      |
| tph_cloned       | - - - - -                                                          |      |      |
|                  | 190                                                                | 200  | 210  |
| tph_nematostella | <b>A T C A C C A T G T G A A T A T G A C G C A C A T T G A A T</b> |      |      |
| tph_qpcr         | - - - - -                                                          |      |      |
| tph_cloned       | - - - - -                                                          |      |      |
|                  | 220                                                                | 230  | 240  |
| tph_nematostella | <b>C C C G C C C G T C C A A G G C A T G C A A G A C C C G C T</b> |      |      |
| tph_qpcr         | - - - - -                                                          |      |      |
| tph_cloned       | - - - - -                                                          |      |      |
|                  | 250                                                                | 260  | 270  |
| tph_nematostella | <b>A T G A T T T C T T C G C A G A C T G T G A G G G G C T G C</b> |      |      |
| tph_qpcr         | - - - - -                                                          |      |      |
| tph_cloned       | - - - - -                                                          |      |      |
|                  | 280                                                                | 290  | 300  |
| tph_nematostella | <b>A T G G T G C T A G T C T G A A T C A C T T T G T T G A T G</b> |      |      |
| tph_qpcr         | - - - - -                                                          |      |      |
| tph_cloned       | - - - - -                                                          |      |      |
|                  | 310                                                                | 320  | 330  |
| tph_nematostella | <b>C A C T A A A G A A G A G A G C C G T C A A T A T T A C T G</b> |      |      |
| tph_qpcr         | - - - - -                                                          |      |      |
| tph_cloned       | - - - - -                                                          |      |      |
|                  | 340                                                                | 350  | 360  |
| tph_nematostella | <b>T T C T A T C T G A T G A T A A G G G C T C A G T G C C A T</b> |      |      |
| tph_qpcr         | - - - - -                                                          |      |      |
| tph_cloned       | - - - - -                                                          |      |      |
|                  | 370                                                                | 380  | 390  |
| tph_nematostella | <b>G G T T C C C C G C A A G A T T T C T G A T C T G G A C A</b>   |      |      |
| tph_qpcr         | - - - - -                                                          |      |      |
| tph_cloned       | - - - - -                                                          |      |      |
|                  | 400                                                                | 410  | 420  |
| tph_nematostella | <b>A G T T T G C T G A C A G A G T G C T G A G C T A T G G A G</b> |      |      |
| tph_qpcr         | - - - - -                                                          |      |      |
| tph_cloned       | - - - - -                                                          |      |      |
|                  | 430                                                                | 440  | 450  |
| tph_nematostella | <b>C T G A G C T A G A C T C A G A C C A T C C T G G C T T T A</b> |      |      |
| tph_qpcr         | - - - - -                                                          |      |      |
| tph_cloned       | - - - - -                                                          |      |      |
|                  | 460                                                                | 470  | 480  |
| tph_nematostella | <b>C A G A C C A A G T A T A C A G A G C C A G A C G A A A G G</b> |      |      |
| tph_qpcr         | - - - - -                                                          |      |      |
| tph_cloned       | - - - - -                                                          |      |      |
|                  | 490                                                                | 500  | 510  |
| tph_nematostella | <b>A G T T T G C T G A C A T T G C C T T C A A G C A C A A A C</b> |      |      |
| tph_qpcr         | - - - - -                                                          |      |      |
| tph_cloned       | - - - - -                                                          |      |      |
|                  | 520                                                                | 530  | 540  |
| tph_nematostella | <b>A C G G T G A A A T T A T T C C A C A G G T C A C T T A T A</b> |      |      |
| tph_qpcr         | - - - - -                                                          |      |      |
| tph_cloned       | - - - - -                                                          |      |      |
|                  | 550                                                                | 560  | 570  |
| tph_nematostella | <b>C A G A T A T C G A G A T T G C A A C C T G G G A T A A A G</b> |      |      |
| tph_qpcr         | - - - - -                                                          |      |      |
| tph_cloned       | - - - - -                                                          |      |      |
|                  | 580                                                                | 590  | 600  |
| tph_nematostella | <b>T G T T C A C A G A G C T G A C C A A G T T G T A T C C T A</b> |      |      |
| tph_qpcr         | - - - - -                                                          |      |      |
| tph_cloned       | - - - - -                                                          |      |      |
|                  | 610                                                                | 620  | 630  |
| tph_nematostella | <b>C C C A T G C T T G C C G T G A A C A T A A C T T T G T C T</b> |      |      |
| tph_qpcr         | - - - - -                                                          |      |      |
| tph_cloned       | - - - - -                                                          |      |      |
|                  | 640                                                                | 650  | 660  |
| tph_nematostella | <b>G G C C A T T G C T A G T G C A A A A T T G T G G T T A C A</b> |      |      |
| tph_qpcr         | - - - - -                                                          |      |      |
| tph_cloned       | - - - - -                                                          |      |      |
|                  | 670                                                                | 680  | 690  |
| tph_nematostella | <b>G A C T T G G G A A T A T T C C T C A G C T T C A G G A T G</b> |      |      |
| tph_qpcr         | - - - - -                                                          |      |      |
| tph_cloned       | - - - - -                                                          |      |      |
|                  | 700                                                                | 710  | 720  |
| tph_nematostella | <b>T C T C A A T G T T T C T G A A A G A A T G C A C T G G G T</b> |      |      |
| tph_qpcr         | - - - - -                                                          |      |      |
| tph_cloned       | - - - - -                                                          |      |      |
|                  | 730                                                                | 740  | 750  |
| tph_nematostella | <b>T C A C T T T A C G G C C T G T G G C T G G A C T T C T G T</b> |      |      |
| tph_qpcr         | - - - - -                                                          |      |      |
| tph_cloned       | - - - - -                                                          |      |      |
|                  | 760                                                                | 770  | 780  |
| tph_nematostella | <b>C A T C C C G G G A C T T C C T G G C G G G C C T G G C A T</b> |      |      |
| tph_qpcr         | - - - - -                                                          |      |      |
| tph_cloned       | - - - - -                                                          |      |      |
|                  | 790                                                                | 800  | 810  |
| tph_nematostella | <b>T C C G T G T G T T C C A C A G T A C T C A G T A C A T C C</b> |      |      |
| tph_qpcr         | - - - - -                                                          |      |      |
| tph_cloned       | - - - - -                                                          |      |      |
|                  | 820                                                                | 830  | 840  |
| tph_nematostella | <b>G T C A C C C A A C A A A A C C C A T G T A C A C C C C A G</b> |      |      |
| tph_qpcr         | - - - - -                                                          |      |      |
| tph_cloned       | - - - - -                                                          |      |      |
|                  | 850                                                                | 860  | 870  |
| tph_nematostella | <b>A G C C T G A C G T T G T G C A T G A G C T A A T C G G T C</b> |      |      |
| tph_qpcr         | - - - - -                                                          |      |      |
| tph_cloned       | - - - - -                                                          |      |      |
|                  | 880                                                                | 890  | 900  |
| tph_nematostella | <b>A T G T G C C T C T G T T T G C T G A T C C A G A T T T C G</b> |      |      |
| tph_qpcr         | - - - - -                                                          |      |      |
| tph_cloned       | - - - - -                                                          |      |      |
|                  | 910                                                                | 920  | 930  |
| tph_nematostella | <b>C A C A A T T T A G T C A G G A A A T T G G T C T T G C C T</b> |      |      |
| tph_qpcr         | - - - - -                                                          |      |      |
| tph_cloned       | - - - - -                                                          |      |      |
|                  | 940                                                                | 950  | 960  |
| tph_nematostella | <b>C C C T G G G A G C A C C A G A C G A G T G G G T G G A A A</b> |      |      |
| tph_qpcr         | - - - - -                                                          |      |      |
| tph_cloned       | - - - - -                                                          |      |      |
|                  | 970                                                                | 980  | 990  |
| tph_nematostella | <b>A A C T C G C C A C G C T C T A C T G G T T C A C T G T T G</b> |      |      |
| tph_qpcr         | - - - - -                                                          |      |      |
| tph_cloned       | - - - - -                                                          |      |      |
|                  | 1000                                                               | 1010 | 1020 |
| tph_nematostella | <b>A G T T T G G G C T G T G T C G G C A G G A G G G C G A G G</b> |      |      |
| tph_qpcr         | - - - - -                                                          |      |      |
| tph_cloned       | - - - - -                                                          |      |      |
|                  | 1030                                                               | 1040 | 1050 |
| tph_nematostella | <b>T G A A A G C G T A C G G C G C T G G T C T A T T G T C C T</b> |      |      |
| tph_qpcr         | - - - - -                                                          |      |      |
| tph_cloned       | - - - - -                                                          |      |      |
|                  | 1060                                                               | 1070 | 1080 |
| tph_nematostella | <b>C C T T T G G G A G T T A C A G T A T T G C T T G A C C G</b>   |      |      |
| tph_qpcr         | - - - - -                                                          |      |      |
| tph_cloned       | - - - - -                                                          |      |      |
|                  | 1090                                                               | 1100 | 1110 |
| tph_nematostella | <b>A T G A G C C C A A G A A A T A C C C T C T G G A G C C T G</b> |      |      |
| tph_qpcr         | - - - - -                                                          |      |      |
| tph_cloned       | - - - - -                                                          |      |      |
|                  | 1120                                                               | 1130 | 1140 |
| tph_nematostella | <b>A A A A G A C C A G T G T A C A G A A G T A C C C A T C A</b>   |      |      |
| tph_qpcr         | - - - - -                                                          |      |      |
| tph_cloned       | - - - - -                                                          |      |      |
|                  | 1150                                                               | 1160 | 1170 |
| tph_nematostella | <b>C G C A G T A C C A G C C A G T C T A C T T C A T T G C C G</b> |      |      |
| tph_qpcr         | - - - - -                                                          |      |      |
| tph_cloned       | - - - - -                                                          |      |      |
|                  | 1180                                                               | 1190 | 1200 |
| tph_nematostella | <b>A C A G T T T C T T G T C G G C C A G A A A C A A A G T T A</b> |      |      |
| tph_qpcr         | - - - - -                                                          |      |      |
| tph_cloned       | - - - - -                                                          |      |      |
|                  | 1210                                                               | 1220 | 1230 |
| tph_nematostella | <b>G G A A A C C C T G T T T T A T T A C C A A G G A A T A G A</b> |      |      |
| tph_qpcr         | - - - - -                                                          |      |      |
| tph_cloned       | - - - - -                                                          |      |      |
|                  | 1240                                                               | 1250 | 1260 |
| tph_nematostella | <b>A C T T A A G C T T A T A A G C A A T G T A T T G C A A G G</b> |      |      |
| tph_qpcr         | - - - - -                                                          |      |      |
| tph_cloned       | - - - - -                                                          |      |      |
|                  | 1270                                                               | 1280 | 1290 |
| tph_nematostella | <b>C C T T G T A G T T T T A T A A C A G C A A G A A T T G T A</b> |      |      |
| tph_qpcr         | - - - - -                                                          |      |      |
| tph_cloned       | - - - - -                                                          |      |      |
|                  | 1300                                                               | 1310 | 1320 |
| tph_nematostella | <b>G G A A G A A T T T T G T G C A A T A T A T G T A A A G G T</b> |      |      |
| tph_qpcr         | - - - - -                                                          |      |      |
| tph_cloned       | - - - - -                                                          |      |      |
|                  | 1330                                                               | 1340 | 1350 |
| tph_nematostella | <b>A T T C T T A G G C A A G G G A A T A T G T G T T A A G G A</b> |      |      |
| tph_qpcr         | - - - - -                                                          |      |      |
| tph_cloned       | - - - - -                                                          |      |      |
|                  | 1360                                                               | 1370 | 1380 |
| tph_nematostella | <b>C T G T T T T G T T G T G A T T T T A G A A A A C T A T C C</b> |      |      |
| tph_qpcr         | - - - - -                                                          |      |      |
| tph_cloned       | - - - - -                                                          |      |      |
|                  | 1390                                                               | 1400 | 1410 |
| tph_nematostella | <b>C C C A T C C C T T T C C C T C C A T T G G T A A T G T A G</b> |      |      |
| tph_qpcr         | - - - - -                                                          |      |      |
| tph_cloned       | - - - - -                                                          |      |      |
|                  | 1420                                                               | 1430 | 1440 |
| tph_nematostella | <b>T G A T A T C A A G A A A A A A T T C A T T A G G T A T T T</b> |      |      |
| tph_qpcr         | - - - - -                                                          |      |      |
| tph_cloned       | - - - - -                                                          |      |      |
|                  | 1450                                                               | 1460 | 1470 |
| tph_nematostella | <b>A A G C T C T G T G T T A T T T A T A G A C T G G A T T T T</b> |      |      |
| tph_qpcr         | - - - - -                                                          |      |      |
| tph_cloned       | - - - - -                                                          |      |      |
|                  | 1480                                                               | 1490 | 1500 |
| tph_nematostella | <b>T C C C G A C C T G T A G T A T C T T A A A G A C C G G T A</b> |      |      |
| tph_qpcr         | - - - - -                                                          |      |      |
| tph_cloned       | - - - - -                                                          |      |      |
|                  | 1510                                                               | 1520 | 1530 |
| tph_nematostella | <b>G T A T C T T A A G A T C T G T G G A T T A A A C T T T T T</b> |      |      |
| tph_qpcr         | - - - - -                                                          |      |      |
| tph_cloned       | - - - - -                                                          |      |      |
|                  | 1540                                                               | 1550 | 1560 |
| tph_nematostella | <b>A T T A A A A G A A C C A T T A T C A C C C A C A C C G T T</b> |      |      |
| tph_qpcr         | - - - - -                                                          |      |      |
| tph_cloned       | - - - - -                                                          |      |      |
|                  | 1570                                                               | 1580 | 1590 |
| tph_nematostella | <b>G T T A T T G T T T C A C A A T A T T A A C C A T A A A C A</b> |      |      |
| tph_qpcr         | - - - - -                                                          |      |      |
| tph_cloned       | - - - - -                                                          |      |      |
|                  | 1600                                                               | 1610 | 1620 |
| tph_nematostella | <b>C A A G A A C A A T A T C C A C A G C T T A C A G T G T C A</b> |      |      |
| tph_qpcr         | - - - - -                                                          |      |      |
| tph_cloned       | - - - - -                                                          |      |      |
|                  | 1630                                                               | 1640 | 1650 |
| tph_nematostella | <b>C A A T G T T T T A A G G A G T G C A C T G T C T G A T T A</b> |      |      |
| tph_qpcr         | - - - - -                                                          |      |      |
| tph_cloned       | - - - - -                                                          |      |      |
|                  | 1660                                                               | 1670 | 1680 |
| tph_nematostella | <b>A A A T G A A C T T A A A T A A C T G G T G T G G C A A A G</b> |      |      |
| tph_qpcr         | - - - - -                                                          |      |      |
| tph_cloned       | - - - - -                                                          |      |      |
|                  | 1690                                                               | 1700 | 1710 |
| tph_nematostella | <b>G A T G A T T C A A T G C A C A T C A G A A C A G G T G T G</b> |      |      |
| tph_qpcr         | - - - - -                                                          |      |      |
| tph_cloned       | - - - - -                                                          |      |      |
|                  | 1720                                                               | 1730 | 1740 |
| tph_nematostella | <b>T G C C C G G G A T T G G C T G A T G G G G G T G C A C A G</b> |      |      |
| tph_qpcr         | - - - - -                                                          |      |      |
| tph_cloned       | - - - - -                                                          |      |      |
|                  | 1750                                                               | 1760 | 1770 |
| tph_nematostella | <b>T C A T A G G T A T A T G G A A A G A G C A T T G T A T T T</b> |      |      |
| tph_qpcr         | - - - - -                                                          |      |      |
| tph_cloned       | - - - - -                                                          |      |      |
|                  | 1780                                                               | 1790 | 1800 |
| tph_nematostella | <b>G A A G A C C A A C T T T T T T T T T T T G G G G G G G G G</b> |      |      |
| tph_qpcr         | - - - - -                                                          |      |      |
| tph_cloned       | - - - - -                                                          |      |      |
|                  | 1810                                                               | 1820 | 1830 |
| tph_nematostella | <b>G G G G G A G A G G G T G A T C G T G C A C C C T G T G C A</b> |      |      |
| tph_qpcr         | - - - - -                                                          |      |      |
| tph_cloned       | - - - - -                                                          |      |      |
|                  | 1840                                                               | 1850 | 1860 |
| tph_nematostella | <b>C C C C C T G C G T C T G C A C C T G C A G A A T A T G A</b>   |      |      |
| tph_qpcr         | - - - - -                                                          |      |      |
| tph_cloned       | - - - - -                                                          |      |      |
|                  | 1870                                                               | 1880 | 1890 |
| tph_nematostella | <b>T G G A C A T T T C C A A G T T A T C A A C T T A A T C C A</b> |      |      |
| tph_qpcr         | - - - - -                                                          |      |      |
| tph_cloned       | - - - - -                                                          |      |      |
|                  | 1900                                                               | 1910 | 1920 |
| tph_nematostella | <b>G T G A T T C T T G C G A C C T A A T T A G C T A A C T T C</b> |      |      |
| tph_qpcr         | - - - - -                                                          |      |      |
| tph_cloned       | - - - - -                                                          |      |      |
|                  | 1930                                                               | 1940 | 1950 |
| tph_nematostella | <b>C A C T T T G A C A A T G G T G G C A A C G G C A T T A T T</b> |      |      |
| tph_qpcr         | - - - - -                                                          |      |      |
| tph_cloned       | - - - - -                                                          |      |      |
|                  | 1960                                                               | 1970 | 1980 |
| tph_nematostella | <b>T G A T A A C C G T C T T A T C A T C T G A A A T T G A A A</b> |      |      |
| tph_qpcr         | - - - - -                                                          |      |      |
| tph_cloned       | - - - - -                                                          |      |      |
|                  | 1990                                                               | 2000 | 2010 |
| tph_nematostella | <b>G A G C T G C T C A T G A A A C A T T A A A T T A T A T A T</b> |      |      |
| tph_qpcr         | - - - - -                                                          |      |      |
| tph_cloned       | - - - - -                                                          |      |      |
|                  | 2020                                                               | 2030 | 2040 |
| tph_nematostella | <b>G C C T A T T T C A A A T</b>                                   |      |      |
| tph_qpcr         | - - - - -                                                          |      |      |
| tph_cloned       | - - - - -                                                          |      |      |
