# Supplementary material for: Developmental and light-entrained expression of melatonin and its relationship to the circadian clock in the sea anemone Nematostella vectensis
Source: PubMed Central journal article supplement (PMC4169136; doi:10.1186/2041-9139-5-26), 2014-08-14
Supplement: 2041-9139-5-26-S4.pdf [file 2041-9139-5-26-S4.pdf]

# Formatted Alignments

|                    |                                                                           |      |      |
|--------------------|---------------------------------------------------------------------------|------|------|
|                    | 10                                                                        | 20   | 30   |
| hiomt_nematostella | <b>C T T T C T C A T T G T G A A A T G G C A G A A T T G A C A</b>        |      |      |
| hiomt_qpcr         | - - - - -                                                                 |      |      |
| hiomt_cloned       | - - - - - <b>T C A T T G T G A A A T G G C A G A A T T G A C A</b>        |      |      |
|                    | C T T T C T C A T T G T G A A A T G G C A G A A T T G A C A               |      |      |
|                    | 40                                                                        | 50   | 60   |
| hiomt_nematostella | <b>A G T A C T C T C G G T A C A A T C A T A C C T A C A G C C C</b>      |      |      |
| hiomt_qpcr         | - - - - -                                                                 |      |      |
| hiomt_cloned       | <b>A G T A C T C T C G G T A C A A T C A T A C C T A C A G C C C</b>      |      |      |
|                    | A G T A C T C T C G G T A C A A T C A T A C C T A C A G C C C             |      |      |
|                    | 70                                                                        | 80   | 90   |
| hiomt_nematostella | <b>C T T T C A G A T A T T T T T C A T G G A T T T G T T A A A</b>        |      |      |
| hiomt_qpcr         | - - - - -                                                                 |      |      |
| hiomt_cloned       | <b>C T T T C A G A T A T T T T T C A T G G A T T T G T T A A A</b>        |      |      |
|                    | C T T T C A G A T A T T T T T C A T G G A T T T G T T A A A               |      |      |
|                    | 100                                                                       | 110  | 120  |
| hiomt_nematostella | <b>T C A A A A G T A T T G T T C A C C G C C T G T G A A T T A</b>        |      |      |
| hiomt_qpcr         | - - - - -                                                                 |      |      |
| hiomt_cloned       | <b>T C A A A A G T A T T G T T C A C C G C C T G T G A A T T A</b>        |      |      |
|                    | T C A A A A G T A T T G T T C A C C G C C T G T G A A T T A               |      |      |
|                    | 130                                                                       | 140  | 150  |
| hiomt_nematostella | <b>G G T A T A T T T G A C G T A C T G T G C G A T A A G C A T</b>        |      |      |
| hiomt_qpcr         | - - - - -                                                                 |      |      |
| hiomt_cloned       | <b>G G T A T A T T T G A C G T A C T G T G C G A T A A G C A T</b>        |      |      |
|                    | G G T A T A T T T G A C G T A C T G T G C G A T A A G C A T               |      |      |
|                    | 160                                                                       | 170  | 180  |
| hiomt_nematostella | <b>T C G G C A G A A C A T G T G G C A G A A A A T G T T A A A</b>        |      |      |
| hiomt_qpcr         | - - - - -                                                                 |      |      |
| hiomt_cloned       | <b>T C G G C A G A A C A T G T G G C A G A A A A T G T T A A A</b>        |      |      |
|                    | T C G G C A G A A C A T G T G G C A G A A A A T G T T A A A               |      |      |
|                    | 190                                                                       | 200  | 210  |
| hiomt_nematostella | <b>C C A A G C T G C A A A A C T G G C T C A A C T C G T C G T</b>        |      |      |
| hiomt_qpcr         | - - - - -                                                                 |      |      |
| hiomt_cloned       | <b>C C A A G C T G C A A A A C T G G C T C A A C T C G T C G T</b>        |      |      |
|                    | C C A A G C T G C A A A A C T G G C T C A A C T C G T C G T               |      |      |
|                    | 220                                                                       | 230  | 240  |
| hiomt_nematostella | <b>C T T C T T G A C A C A C T T G T A G C T A T G C A A T T A</b>        |      |      |
| hiomt_qpcr         | - - - - -                                                                 |      |      |
| hiomt_cloned       | <b>C T T C T T G A C A C A C T T G T A G C T A T G C A A T T A</b>        |      |      |
|                    | C T T C T T G A C A C A C T T G T A G C T A T G C A A T T A               |      |      |
|                    | 250                                                                       | 260  | 270  |
| hiomt_nematostella | <b>C T T G T C A A A G A A A T G G A C A G C G A C C C G C C T</b>        |      |      |
| hiomt_qpcr         | - - - - -                                                                 |      |      |
| hiomt_cloned       | <b>C T T G T C A A A G A A A T G G A C A G C G A C C C G C C T</b>        |      |      |
|                    | C T T G T C A A A G A A A T G G A C A G C G A C C C G C C T               |      |      |
|                    | 280                                                                       | 290  | 300  |
| hiomt_nematostella | <b>G T C T A C T T T C A A T A G C C A A A C T G C A G A G G C A</b>      |      |      |
| hiomt_qpcr         | - - - - -                                                                 |      |      |
| hiomt_cloned       | <b>G T C T A C T T T C A A T A G C C A A A C T G C A G A G G C A</b>      |      |      |
|                    | G T C T A C T T T C A A T A G C C A A A C T G C A G A G G C A             |      |      |
|                    | 310                                                                       | 320  | 330  |
| hiomt_nematostella | <b>T T T C T T A C T A G G A A A A G T C C C A A G T C T C T C</b>        |      |      |
| hiomt_qpcr         | - - - - -                                                                 |      |      |
| hiomt_cloned       | <b>T T T C T T A C T A G G A A A A G T C C C A A G T C T C T C</b>        |      |      |
|                    | T T T C T T A C T A G G A A A A G T C C C A A G T C T C T C               |      |      |
|                    | 340                                                                       | 350  | 360  |
| hiomt_nematostella | <b>A T A A G C T A C T T T G A A T T T C T T C A C G C C A C C</b>        |      |      |
| hiomt_qpcr         | - - - - -                                                                 |      |      |
| hiomt_cloned       | <b>A T A A G C T A C T T T G A A T T T C T T C A C G C C A C C</b>        |      |      |
|                    | A T A A G C T A C T T T G A A T T T C T T C A C G C C A C C               |      |      |
|                    | 370                                                                       | 380  | 390  |
| hiomt_nematostella | <b>G A T T A C A A G C T A T T T G A C A A C C T G A A G C A T</b>        |      |      |
| hiomt_qpcr         | - - - - -                                                                 |      |      |
| hiomt_cloned       | <b>G A T T A C A A G C T A T T T G A C A A C C T G A A</b> - <b>C A T</b> |      |      |
|                    | G A T T A C A A G C T A T T T G A C A A C C T G A A G C A T               |      |      |
|                    | 400                                                                       | 410  | 420  |
| hiomt_nematostella | <b>G C G G T T G T C G A G G A G C A G C C A C A A T G G C A A</b>        |      |      |
| hiomt_qpcr         | - - - - -                                                                 |      |      |
| hiomt_cloned       | <b>G C G G T T G T C G A G G A G C A G C C A C A A T G G C A A</b>        |      |      |
|                    | G C G G T T G T C G A G G A G C A G C C A C A A T G G C A A               |      |      |
|                    | 430                                                                       | 440  | 450  |
| hiomt_nematostella | <b>C G A G C C T T C G A T C A G C C G G C T T C A G A A A T T</b>        |      |      |
| hiomt_qpcr         | - - - - -                                                                 |      |      |
| hiomt_cloned       | <b>C G A G C C T T C G A T C A G C C G G C T T C A G A A A T T</b>        |      |      |
|                    | C G A G C C T T C G A T C A G C C G G C T T C A G A A A T T               |      |      |
|                    | 460                                                                       | 470  | 480  |
| hiomt_nematostella | <b>T A C A A A A T A G T G C A T T C C A A T A A G A A G A G</b>          |      |      |
| hiomt_qpcr         | - - - - -                                                                 |      |      |
| hiomt_cloned       | <b>T A C A A A A T A G T G C A T T C C A A T A A G A A G A G</b>          |      |      |
|                    | T A C A A A A T A G T G C A T T C C A A T A A G A A G A G                 |      |      |
|                    | 490                                                                       | 500  | 510  |
| hiomt_nematostella | <b>C T G G T G C G T A T C T A C T C G A G A T T T G A T T G C</b>        |      |      |
| hiomt_qpcr         | - - - - -                                                                 |      |      |
| hiomt_cloned       | <b>C T G G T G C G T A T C T A C T C G A G A T T T G A T T G C</b>        |      |      |
|                    | C T G G T G C G T A T C T A C T C G A G A T T T G A T T G C               |      |      |
|                    | 520                                                                       | 530  | 540  |
| hiomt_nematostella | <b>G T T C A C C G A T T G G A A G C A C C T G G G G T G A T G</b>        |      |      |
| hiomt_qpcr         | - - - - -                                                                 |      |      |
| hiomt_cloned       | <b>G T T C A C C G A T T G G A A G C A C C T G G G G T G A T G</b>        |      |      |
|                    | G T T C A C C G A T T G G A A G C A C C T G G G G T G A T G               |      |      |
|                    | 550                                                                       | 560  | 570  |
| hiomt_nematostella | <b>T C T G C G T T T G A C T T G A A C C C T T T T A A A C A C</b>        |      |      |
| hiomt_qpcr         | - - - - -                                                                 |      |      |
| hiomt_cloned       | <b>T C T G C G T T T G A C T T G A A C C C T T T T A A A C A C</b>        |      |      |
|                    | T C T G C G T T T G A C T T G A A C C C T T T T A A A C A C               |      |      |
|                    | 580                                                                       | 590  | 600  |
| hiomt_nematostella | <b>A T G T G T G A T C T T G G A G G A G G A A C T G G C T G T</b>        |      |      |
| hiomt_qpcr         | - - - - -                                                                 |      |      |
| hiomt_cloned       | <b>A T G T G T G A T C T T G G A G G A G G A A C T G G C T G T</b>        |      |      |
|                    | A T G T G T G A T C T T G G A G G A G G A A C T G G C T G T               |      |      |
|                    | 610                                                                       | 620  | 630  |
| hiomt_nematostella | <b>T T T T C A T A C G A G G C G T G C A A G C A G T A T C C T</b>        |      |      |
| hiomt_qpcr         | - - - - -                                                                 |      |      |
| hiomt_cloned       | <b>T T T T C A T A C G A G G C G T G C A A G C A G T A T C C T</b>        |      |      |
|                    | T T T T C A T A C G A G G C G T G C A A G C A G T A T C C T               |      |      |
|                    | 640                                                                       | 650  | 660  |
| hiomt_nematostella | <b>G C A T T A A A A A T C A C A A T T T A C G A A A T G C A G</b>        |      |      |
| hiomt_qpcr         | - - - - -                                                                 |      |      |
| hiomt_cloned       | <b>G C A T T A A A A A T C A C A A T T T A C G A A A T G C A G</b>        |      |      |
|                    | G C A T T A A A A A T C A C A A T T T A C G A A A T G C A G               |      |      |
|                    | 670                                                                       | 680  | 690  |
| hiomt_nematostella | <b>C C A A T C T T A G A T G T C G C G C C T G C T T T C A A G</b>        |      |      |
| hiomt_qpcr         | - - - - -                                                                 |      |      |
| hiomt_cloned       | <b>C C A A T C T T A G A T G T C G C G C C T G C T T T C A A G</b>        |      |      |
|                    | C C A A T C T T A G A T G T C G C G C C T G C T T T C A A G               |      |      |
|                    | 700                                                                       | 710  | 720  |
| hiomt_nematostella | <b>C C A A C C A T C G C T G A T T G C C C T A A C C A A T C A</b>        |      |      |
| hiomt_qpcr         | - - - - -                                                                 |      |      |
| hiomt_cloned       | <b>C C A A C C A T C G C T G A T T G C C C T A A C C A A T C A</b>        |      |      |
|                    | C C A A C C A T C G C T G A T T G C C C T A A C C A A T C A               |      |      |
|                    | 730                                                                       | 740  | 750  |
| hiomt_nematostella | <b>A A C G T C A C C T A C G T A G C G G G A G A C T T T T T T</b>        |      |      |
| hiomt_qpcr         | - - - - -                                                                 |      |      |
| hiomt_cloned       | <b>A A C G T C A C C T A C G T A G C G G G A G A C T T T T T T</b>        |      |      |
|                    | A A C G T C A C C T A C G T A G C G G G A G A C T T T T T T               |      |      |
|                    | 760                                                                       | 770  | 780  |
| hiomt_nematostella | <b>A A A G A C C C A C T T C C G G T T G C T G A C C T G T A T</b>        |      |      |
| hiomt_qpcr         | - - - - -                                                                 |      |      |
| hiomt_cloned       | <b>A A A G A C C C A C T T C C G G T T G C T G A C C T</b> - <b>T A T</b> |      |      |
|                    | A A A G A C C C A C T T C C G G T T G C T G A C C T G T A T               |      |      |
|                    | 790                                                                       | 800  | 810  |
| hiomt_nematostella | <b>T T T C T G G C C C A T G T T C T C C A C A A T T G G G C A</b>        |      |      |
| hiomt_qpcr         | - - - - -                                                                 |      |      |
| hiomt_cloned       | <b>T T T C T G G C C C A T G T T C T C C A C A A T T G G G C A</b>        |      |      |
|                    | T T T C T G G C C C A T G T T C T C C A C A A T T G G G C A               |      |      |
|                    | 820                                                                       | 830  | 840  |
| hiomt_nematostella | <b>G A A G A A A A G G T T G A C T T G C T A C T T A G C A A A</b>        |      |      |
| hiomt_qpcr         | - - - - -                                                                 |      |      |
| hiomt_cloned       | <b>G A A G A A A A G G T T G A C T T G C T A C T T A G C A A A</b>        |      |      |
|                    | G A A G A A A A G G T T G A C T T G C T A C T T A G C A A A               |      |      |
|                    | 850                                                                       | 860  | 870  |
| hiomt_nematostella | <b>G T T T T T G C A G T G C T G C C A C C A G G T G G A G G T</b>        |      |      |
| hiomt_qpcr         | - - - - -                                                                 |      |      |
| hiomt_cloned       | <b>G T T T T T G C A G T G C T G C C A C C A G G T G G A G G T</b>        |      |      |
|                    | G T T T T T G C A G T G C T G C C A C C A G G T G G A G G T               |      |      |
|                    | 880                                                                       | 890  | 900  |
| hiomt_nematostella | <b>A T A C T T C T T G G G G A A G T T C T T C T T C C T G T T</b>        |      |      |
| hiomt_qpcr         | - - - - -                                                                 |      |      |
| hiomt_cloned       | <b>A T A C T T C T T G G G G A A G T T C T T C T T C C T G T T</b>        |      |      |
|                    | A T A C T T C T T G G G G A A G T T C T T C T T C C T G T T               |      |      |
|                    | 910                                                                       | 920  | 930  |
| hiomt_nematostella | <b>G A C G A G C C G A A T C C A C A G C T C T C T G C A C C C</b>        |      |      |
| hiomt_qpcr         | - - - - -                                                                 |      |      |
| hiomt_cloned       | <b>G A C G A G C C G A A T C C A C A G C T C T C T G C A C C C</b>        |      |      |
|                    | G A C G A G C C G A A T C C A C A G C T C T C T G C A C C C               |      |      |
|                    | 940                                                                       | 950  | 960  |
| hiomt_nematostella | <b>T T C C T G G A C C T C A C C A T G C T A G T G A C C T G C</b>        |      |      |
| hiomt_qpcr         | - - - - -                                                                 |      |      |
| hiomt_cloned       | <b>T T C C T G G A C C T C A C C A T G C T A G T G A C C T G C</b>        |      |      |
|                    | T T C C T G G A C C T C A C C A T G C T A G T G A C C T G C               |      |      |
|                    | 970                                                                       | 980  | 990  |
| hiomt_nematostella | <b>G A G T C A G G G G C A C G T G A C C G T T C G G G C C C C</b>        |      |      |
| hiomt_qpcr         | - - - - -                                                                 |      |      |
| hiomt_cloned       | <b>G A G T C A G G G G C A C G T G A C C G T T C G G G C C C C</b>        |      |      |
|                    | G A G T C A G G G G C A C G T G A C C G T T C G G G C C C C               |      |      |
|                    | 1000                                                                      | 1010 | 1020 |
| hiomt_nematostella | <b>G A G T A C A A A C G A T T A C T G G A A A G A C A T G G A</b>        |      |      |
| hiomt_qpcr         | - - - - -                                                                 |      |      |
| hiomt_cloned       | <b>G A G T A C A A A C G A T T A C T G G A A A G A C A T G G A</b>        |      |      |
|                    | G A G T A C A A A C G A T T A C T G G A A A G A C A T G G A               |      |      |
|                    | 1030                                                                      | 1040 | 1050 |
| hiomt_nematostella | <b>T T T C A A G A C G T G C G G A T G A A A T C C T T G C C A</b>        |      |      |
| hiomt_qpcr         | - - - - -                                                                 |      |      |
| hiomt_cloned       | <b>T T T C A A G A C G T G C G G A T G A A A T C C T T G C C A</b>        |      |      |
|                    | T T T C A A G A C G T G C G G A T G A A A T C C T T G C C A               |      |      |
|                    | 1060                                                                      | 1070 | 1080 |
| hiomt_nematostella | <b>G G C G C C A A A A C G A C C G A T G C T G T T T T C G C C</b>        |      |      |
| hiomt_qpcr         | - - - - -                                                                 |      |      |
| hiomt_cloned       | <b>G G C G C C A A A A C G A C C G A T G C T G T T T T C G C C</b>        |      |      |
|                    | G G C G C C A A A A C G A C C G A T G C T G T T T T C G C C               |      |      |
|                    | 1090                                                                      | 1100 | 1110 |
| hiomt_nematostella | <b>C G G A A A C C T T A A A A T C G C C A C G G C G C G A C G</b>        |      |      |
| hiomt_qpcr         | - - - - -                                                                 |      |      |
| hiomt_cloned       | <b>C G G A A A C C T T A A A A T C G C C A C G G C G C G A C G</b>        |      |      |
|                    | C G G A A A C C T T A A A A T C G C C A C G G C G C G A C G               |      |      |
|                    | 1120                                                                      | 1130 | 1140 |
| hiomt_nematostella | <b>G C A C T T A T A C T T T A C C A T A C G T A A T T T T C T</b>        |      |      |
| hiomt_qpcr         | - - - - -                                                                 |      |      |
| hiomt_cloned       | <b>G C A C T T A T A C T T T A C C A T A C G T A A T T T T C T</b>        |      |      |
|                    | G C A C T T A T A C T T T A C C A T A C G T A A T T T T C T               |      |      |
|                    | 1150                                                                      | 1160 | 1170 |
| hiomt_nematostella | <b>A C G A C A G C T T G T G A A C A A A A T T A C A A A A T A</b>        |      |      |
| hiomt_qpcr         | - - - - -                                                                 |      |      |
| hiomt_cloned       | <b>A C G A C A G C T T G T G A A C A A A A T T A C A A A A T A</b>        |      |      |
|                    | A C G A C A G C T T G T G A A C A A A A T T A C A A A A T A               |      |      |
|                    | 1180                                                                      | 1190 | 1200 |
| hiomt_nematostella | <b>T C C G C T T T G G C A T T A A A C C</b>                              |      |      |
| hiomt_qpcr         | - - - - -                                                                 |      |      |
| hiomt_cloned       | <b>T C C G C T T T G</b> - - - - -                                        |      |      |
|                    | T C C G C T T T G G C A T T A A A C C                                     |      |      |
