# Supplementary material for: Developmental and light-entrained expression of melatonin and its relationship to the circadian clock in the sea anemone Nematostella vectensis
Source: PubMed Central journal article supplement (PMC4169136; doi:10.1186/2041-9139-5-26), 2014-08-14

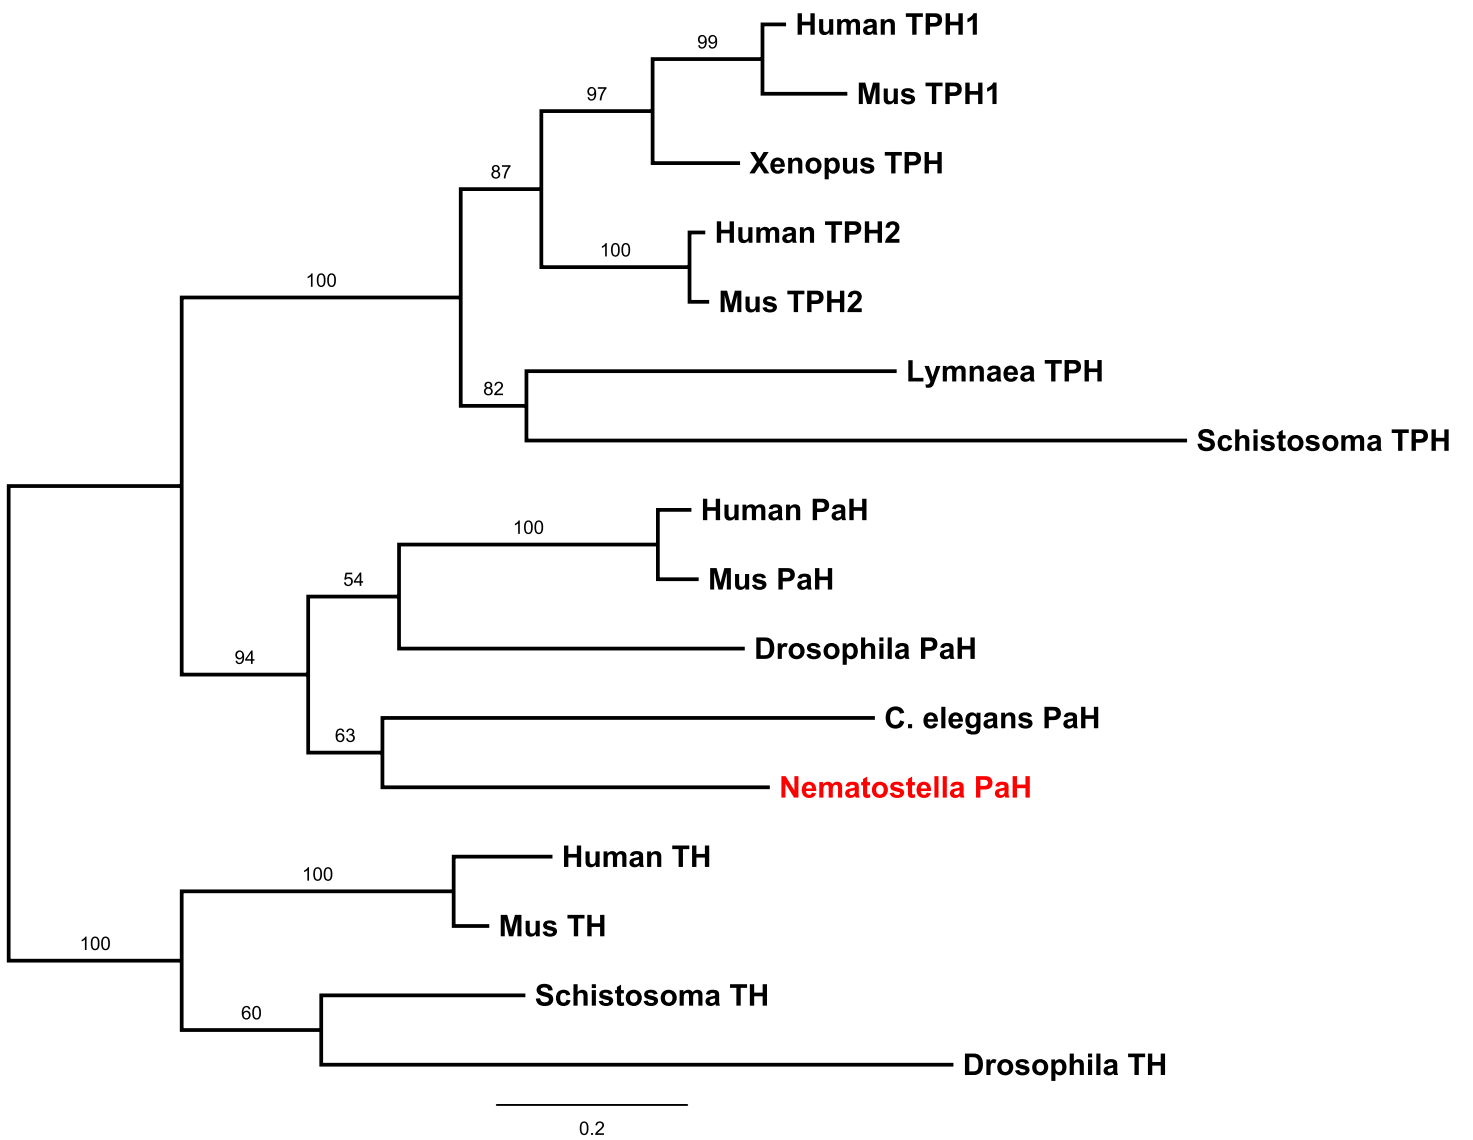

Supplement: 2041-9139-5-26-S5.pdf [file 2041-9139-5-26-S5.pdf]
